# Supplementary material for: Transcriptional Responses of Different Brain Cell Types to Oxygen Decline
Source: MDPI journal article supplement (doi:10.3390/brainsci14040341), 2024-03-30

Figure S1: DEGs per cell type and O2 levels

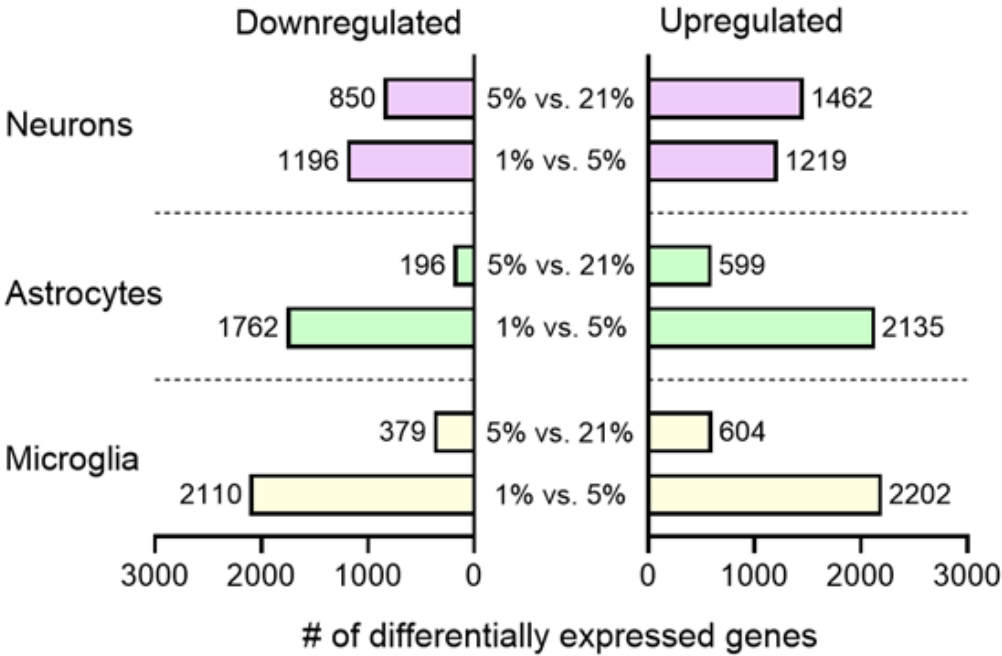

**Fig. S2: Expression level of genes involved in epigenetic regulation in neurons**

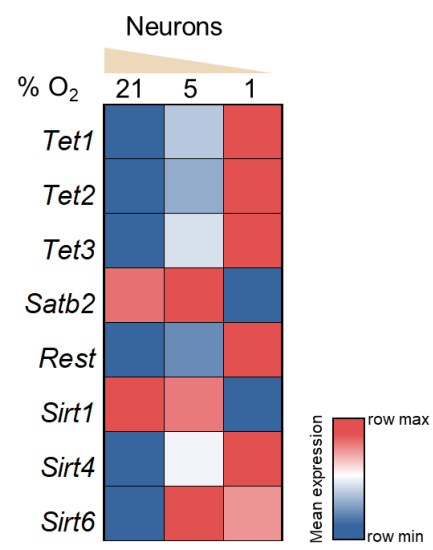

Supplement: s1 [file s1]
