# Supplementary material for: Transcriptional Responses of Different Brain Cell Types to Oxygen Decline
Source: Brain Sci. 2024 Mar 30;14(4):341. doi: 10.3390/brainsci14040341 (PMC11048388; doi:10.3390/brainsci14040341)
Supplement: Supplementary file 1 [file brainsci-14-00341-s001.zip]

Archive with 5 entries (5 files):
- Hypoxia RNAseq suppl Figures.pdf
- TableS1.xlsx
- TableS2.xlsx
- TableS3.xlsx
- TableS4.xlsx
