# Supplementary material for: Transcriptional Responses of Different Brain Cell Types to Oxygen Decline
Source: Brain Sci. 2024 Mar 30;14(4):341. doi: 10.3390/brainsci14040341 (PMC11048388; doi:10.3390/brainsci14040341)
Supplement: Supplementary file 1 [file brainsci-14-00341-s001.zip › TableS1.xlsx]

## Sheet: Table s1
343 common genes between 5v21 and 1v5 up regulated					102 common genes between 5v21 and 1v5 up downregulated
gene_name	gene_id	log2FoldChange	padj		gene_name	gene_id	log2FoldChange	padj
Mgarp	ENSMUSG00000037161	1.87019	6.23182e-15		Txnip	ENSMUSG00000038393	-0.973073	3.57978e-06
Hk2	ENSMUSG00000000628	1.64174	9.41918e-19		Alkal2	ENSMUSG00000054204	-0.930152	0.0126481
Muc2	ENSMUSG00000025515	1.23157	0.00254867		Inpp5d	ENSMUSG00000026288	-1.22376	4.50503e-05
Smtnl2	ENSMUSG00000045667	1.18108	2.68001e-15		AU023762	ENSMUSG00000109890	-0.784048	0.027255
Dmbx1	ENSMUSG00000028707	1.94064	8.75718e-10		Adcyap1	ENSMUSG00000024256	-0.525667	0.000161738
Slc16a3	ENSMUSG00000025161	2.23855	6.16527e-57		Kcnv1	ENSMUSG00000022342	-1.61564	2.98461e-100
Vegfa	ENSMUSG00000023951	1.13602	7.70276e-68		Pcsk1	ENSMUSG00000021587	-0.431528	2.5107e-05
H2-Ab1	ENSMUSG00000073421	1.52978	6.66121e-06		Thrb	ENSMUSG00000021779	-0.651593	1.79286e-12
Npc1l1	ENSMUSG00000020447	1.08019	0.000371645		Smim43	ENSMUSG00000085007	-1.13503	0.000279467
Gipr	ENSMUSG00000030406	1.32578	4.88541e-17		mt-Te	ENSMUSG00000064369	-2.00454	7.87746e-21
P4ha2	ENSMUSG00000018906	1.53331	6.86791e-18		Bdnf	ENSMUSG00000048482	-0.509317	5.93551e-06
Stc2	ENSMUSG00000020303	1.32708	1.31105e-59		Rbm12	ENSMUSG00000089824	-0.694884	1.06905e-06
Ankrd37	ENSMUSG00000050914	0.939215	4.09145e-11		Zbtb46	ENSMUSG00000027583	-0.543517	1.15582e-06
Pfkfb3	ENSMUSG00000026773	1.31645	3.76931e-127		Gm9954	ENSMUSG00000104868	-0.546394	0.00149149
Gys1	ENSMUSG00000003865	1.31532	2.41992e-14		Nppc	ENSMUSG00000026241	-0.687572	0.000414132
Ier3	ENSMUSG00000003541	1.97031	1.24959e-72		Fam107a	ENSMUSG00000021750	-0.472459	2.56117e-07
2500002B13Rik	ENSMUSG00000096917	1.05823	2.12595e-05		Diras2	ENSMUSG00000047842	-0.390167	9.83158e-15
Tnfsf9	ENSMUSG00000035678	0.784535	0.0111256		Cdh8	ENSMUSG00000036510	-0.267422	0.0195383
H2-T-ps	ENSMUSG00000073405	1.3547	0.00197062		Rgs4	ENSMUSG00000038530	-0.344214	1.84573e-07
Triobp	ENSMUSG00000033088	0.967888	3.20083e-05		Ptchd1	ENSMUSG00000041552	-0.478089	0.00776034
Nts	ENSMUSG00000019890	0.907678	4.09681e-05		Wdr5b	ENSMUSG00000034379	-0.616868	0.0133258
Tdrd6	ENSMUSG00000040140	1.07348	0.00172815		Palmd	ENSMUSG00000033377	-1.33909	5.95652e-22
Trib3	ENSMUSG00000032715	0.762177	2.37078e-08		Abracl	ENSMUSG00000078453	-0.601864	0.0463484
Ero1a	ENSMUSG00000021831	1.47695	6.53454e-157		mt-Nd2	ENSMUSG00000064345	-0.625258	0.000405978
Atg9b	ENSMUSG00000038295	0.996023	1.69947e-07		A830029E22Rik	ENSMUSG00000103695	-0.944839	0.00344152
Rgs11	ENSMUSG00000024186	0.363171	0.020947		Fam163a	ENSMUSG00000015484	-0.570761	0.0113218
Ppp1r3g	ENSMUSG00000050423	0.791948	0.00114428		Mlip	ENSMUSG00000032355	-0.48494	0.000705904
Gper1	ENSMUSG00000053647	0.689236	0.0426101		Rbm11	ENSMUSG00000032940	-0.737187	0.0160996
Jmjd6	ENSMUSG00000056962	0.974163	2.7851e-56		Jrk	ENSMUSG00000046380	-0.594116	0.000688233
Adm	ENSMUSG00000030790	1.84894	2.01454e-44		Sema3a	ENSMUSG00000028883	-0.291311	0.0130791
Pdk1	ENSMUSG00000006494	1.0683	1.33604e-47		Hcrtr2	ENSMUSG00000032360	-1.24363	1.09665e-06
Rho	ENSMUSG00000030324	1.08068	0.000373516		Chsy3	ENSMUSG00000058152	-0.6044	0.000210976
Gm49759	ENSMUSG00000111394	0.6083	2.86223e-10		Unc5c	ENSMUSG00000059921	-0.367168	1.08244e-06
Pfkl	ENSMUSG00000020277	0.915976	6.07955e-42		Syndig1	ENSMUSG00000074736	-0.303239	0.0283617
Stc1	ENSMUSG00000014813	0.899165	3.79694e-20		C630043F03Rik	ENSMUSG00000084910	-0.647879	0.00162854
Ciart	ENSMUSG00000038550	1.42716	1.09823e-45		6430584L05Rik	ENSMUSG00000108228	-0.676781	0.0405512
Myo1h	ENSMUSG00000066952	0.786235	0.0246653		Egr4	ENSMUSG00000071341	-0.554585	0.0219582
Grem1	ENSMUSG00000074934	0.881696	0.0225593		Syt9	ENSMUSG00000062542	-0.558154	9.99872e-05
Ccl17	ENSMUSG00000031780	1.06516	0.00962211		Cdh20	ENSMUSG00000050840	-0.355821	0.00781305
Ghsr	ENSMUSG00000051136	0.820533	0.0190573		Gm3693	ENSMUSG00000098128	-0.712403	0.00251374
Itk	ENSMUSG00000020395	1.15053	0.000802212		Zfp125	ENSMUSG00000069755	-0.836509	0.00303414
Ak4	ENSMUSG00000028527	0.857931	8.74912e-41		Kcnj3	ENSMUSG00000026824	-0.41274	5.24528e-09
Slc2a1	ENSMUSG00000028645	1.22939	4.04769e-95		Gm28661	ENSMUSG00000102070	-0.298664	0.00799551
Prss35	ENSMUSG00000033491	0.763532	4.97385e-05		Man1a	ENSMUSG00000003746	-0.361113	1.03662e-05
Atf3	ENSMUSG00000026628	0.763834	6.03055e-05		Nwd2	ENSMUSG00000090061	-0.983719	3.07494e-46
Ak3l2-ps	ENSMUSG00000081957	0.671706	0.0139217		Zfp40	ENSMUSG00000002617	-0.292501	0.0404161
Narf	ENSMUSG00000000056	0.559798	1.08615e-26		Slc16a7	ENSMUSG00000020102	-0.319106	0.000248667
Ppp1r13l	ENSMUSG00000040734	0.897515	1.47194e-11		Zfp281	ENSMUSG00000041483	-0.583276	3.34787e-11
F630040K05Rik	ENSMUSG00000097727	0.821548	0.0259273		Smim18	ENSMUSG00000094500	-0.503528	0.00969806
Plk5	ENSMUSG00000035486	0.93983	0.00053666		Npy1r	ENSMUSG00000036437	-0.809537	4.63389e-16
Fam162a	ENSMUSG00000003955	1.25737	1.50895e-40		Btbd17	ENSMUSG00000000202	-0.41642	0.036872
Ddit4	ENSMUSG00000020108	0.903876	7.92158e-58		B3galt2	ENSMUSG00000033849	-0.622606	1.55341e-09
Tincr	ENSMUSG00000110218	0.949442	0.000195403		Gm15663	ENSMUSG00000085282	-0.494681	0.0256122
Sap30	ENSMUSG00000031609	0.98926	2.15059e-19		Cbfb	ENSMUSG00000031885	-0.294204	0.00226752
Syndig1l	ENSMUSG00000071234	1.0919	1.00657e-21		Kcnj2	ENSMUSG00000041695	-0.83607	1.2081e-05
Ppp1r3c	ENSMUSG00000067279	0.753257	1.03037e-27		St6gal2	ENSMUSG00000024172	-0.528563	2.34487e-16
P4ha1	ENSMUSG00000019916	0.938616	3.63433e-14		BC030500	ENSMUSG00000049946	-0.471223	0.0184678
Mthfd1l	ENSMUSG00000040675	0.926699	1.12433e-16		Met	ENSMUSG00000009376	-0.487635	2.85217e-10
ENSMUSG00000121226	ENSMUSG00000121226	0.412778	0.00973997		Gjd2	ENSMUSG00000068615	-0.502576	5.49432e-06
Rcor2	ENSMUSG00000024968	0.745663	1.22257e-14		Cdh9	ENSMUSG00000025370	-0.347122	0.00429492
Slc27a3	ENSMUSG00000027932	0.516106	0.0017418		Lrguk	ENSMUSG00000056215	-0.520916	0.0133083
Abcc8	ENSMUSG00000040136	0.291783	0.00459881		Nectin3	ENSMUSG00000022656	-0.315823	7.64883e-05
Proser2	ENSMUSG00000045319	1.19654	6.96289e-09		Slc30a1	ENSMUSG00000037434	-0.371826	1.38585e-05
Hmox1	ENSMUSG00000005413	0.405109	9.5107e-06		Arrdc4	ENSMUSG00000042659	-0.484381	3.99147e-06
Hilpda	ENSMUSG00000043421	1.44695	1.77476e-20		Elavl2	ENSMUSG00000008489	-0.519832	2.37127e-10
Gjc2	ENSMUSG00000043448	0.858028	7.13538e-05		Id2	ENSMUSG00000020644	-0.280814	2.83335e-05
Crocc	ENSMUSG00000040860	0.526142	1.57562e-11		C1galt1	ENSMUSG00000042460	-0.404947	0.000266276
Appl2	ENSMUSG00000020263	0.829115	2.75897e-23		Cdh7	ENSMUSG00000026312	-0.41308	0.0353231
Ntsr1	ENSMUSG00000027568	0.747642	1.82103e-35		Htr2a	ENSMUSG00000034997	-0.524008	2.30154e-05
Tnfaip3	ENSMUSG00000019850	1.22394	3.70163e-29		ENSMUSG00000121238	ENSMUSG00000121238	-0.539531	0.0042441
Ldha	ENSMUSG00000063229	0.751191	1.65969e-32		Cdh10	ENSMUSG00000022321	-0.754725	2.20428e-22
Relt	ENSMUSG00000008318	0.469863	0.00685783		2810459M11Rik	ENSMUSG00000026227	-0.654037	8.21855e-10
Egln1	ENSMUSG00000031987	1.12743	3.09219e-59		Top2b	ENSMUSG00000017485	-0.340706	1.77069e-08
Lpin1	ENSMUSG00000020593	0.761711	1.52846e-27		Gpr22	ENSMUSG00000044067	-0.266955	0.0403846
Ccdc115	ENSMUSG00000042111	0.613097	4.70925e-18		Taf9b	ENSMUSG00000047242	-0.397961	3.19797e-05
Fam184b	ENSMUSG00000015879	0.7192	1.18213e-13		Neurod6	ENSMUSG00000037984	-0.912629	3.52246e-33
Tbl2	ENSMUSG00000005374	1.05482	5.70493e-44		Mmp16	ENSMUSG00000028226	-0.432536	8.47645e-06
Fgf11	ENSMUSG00000042826	0.590088	1.81751e-10		9130024F11Rik	ENSMUSG00000087022	-0.611339	4.33308e-05
Galk1	ENSMUSG00000020766	0.957655	2.35497e-20		Slitrk4	ENSMUSG00000046699	-0.282353	0.000442735
Atp7b	ENSMUSG00000006567	0.682512	1.40807e-06		Gm38393	ENSMUSG00000000948	-0.314727	0.0368254
Kdm3a	ENSMUSG00000053470	0.91231	4.85199e-103		Lrrc4c	ENSMUSG00000050587	-0.339437	7.03507e-06
1700017B05Rik	ENSMUSG00000032300	0.475711	1.00753e-06		Adcy8	ENSMUSG00000022376	-0.583732	4.47848e-09
Scrt2	ENSMUSG00000060257	0.409726	0.00179241		Ccdc177	ENSMUSG00000062961	-0.293188	0.0101682
ENSMUSG00000107877	ENSMUSG00000107877	0.379592	0.013152		Tspyl5	ENSMUSG00000038984	-0.355364	0.000322627
Atxn7l2	ENSMUSG00000048997	0.665909	1.54017e-18		Gpr88	ENSMUSG00000068696	-0.323319	1.67031e-05
Plch2	ENSMUSG00000029055	0.282066	0.00818334		Insyn2a	ENSMUSG00000073805	-0.366593	0.00889424
Srrm4	ENSMUSG00000063919	0.570129	1.06919e-22		Adamts8	ENSMUSG00000031994	-0.503782	0.0029218
Kdm4b	ENSMUSG00000024201	0.792686	2.06161e-60		ENSMUSG00000121134	ENSMUSG00000121134	-0.377802	0.0221236
Amz1	ENSMUSG00000050022	0.582304	2.15336e-07		Lypla1	ENSMUSG00000025903	-0.457411	0.000360768
Kdm6b	ENSMUSG00000018476	0.544814	4.12586e-10		Chrna7	ENSMUSG00000030525	-0.272489	0.0412039
Egln3	ENSMUSG00000035105	1.26044	1.40812e-49		Pspc1	ENSMUSG00000021938	-0.430226	6.02674e-09
Ulk3	ENSMUSG00000032308	0.313193	0.0235915		Fbxw7	ENSMUSG00000028086	-0.30924	2.04182e-08
Ndrg1	ENSMUSG00000005125	1.32457	1.63376e-47		Pcdh20	ENSMUSG00000050505	-0.532162	9.77913e-08
Ppp1r15a	ENSMUSG00000040435	0.550828	2.24767e-12		Pnma2	ENSMUSG00000046204	-0.480241	4.02566e-13
Ripply2	ENSMUSG00000047897	0.652662	0.0127133		Rspo3	ENSMUSG00000019880	-0.576825	0.000730904
Prkab2	ENSMUSG00000038205	0.741162	2.49847e-33		Adam19	ENSMUSG00000011256	-0.878142	1.14743e-11
Bnip3	ENSMUSG00000078566	1.12046	3.20054e-81		Homer2	ENSMUSG00000025813	-0.427051	8.94491e-11
Epha8	ENSMUSG00000028661	0.383672	0.00600577		Tmtc2	ENSMUSG00000036019	-0.433857	0.0204878
Higd1a	ENSMUSG00000038412	0.617386	4.66835e-24		Kcnk12	ENSMUSG00000050138	-0.320241	0.00879589
Cdk20	ENSMUSG00000021483	0.646044	5.49699e-12		Dlx1as	ENSMUSG00000084946	-0.380326	0.00678061
Cntn2	ENSMUSG00000053024	0.333529	2.55284e-06		Lrrc8b	ENSMUSG00000070639	-0.359649	2.54572e-09
Apba3	ENSMUSG00000004931	0.434538	8.9828e-09
Rab33a	ENSMUSG00000031104	0.591332	1.05381e-08
Slc37a4	ENSMUSG00000032114	0.686022	9.66406e-12
Slc22a21	ENSMUSG00000063652	0.924883	2.07449e-05
Cacna1h	ENSMUSG00000024112	0.582242	3.0721e-25
Mafa	ENSMUSG00000047591	0.546313	0.018081
Adamts2	ENSMUSG00000036545	0.451675	0.000414564
Traip	ENSMUSG00000032586	0.424075	1.13923e-07
Xylb	ENSMUSG00000035769	0.584421	0.00016234
Espn	ENSMUSG00000028943	1.29077	1.87828e-07
Hook2	ENSMUSG00000052566	0.457735	8.45005e-06
Lonrf3	ENSMUSG00000016239	0.823876	1.76299e-12
Pvr	ENSMUSG00000040511	0.697832	2.68257e-12
Alkbh5	ENSMUSG00000042650	0.734809	6.57977e-57
Ntsr2	ENSMUSG00000020591	0.691969	3.31948e-06
Dubr	ENSMUSG00000022639	0.578098	2.23013e-05
Gm8066	ENSMUSG00000106237	0.587623	0.0435046
Col5a1	ENSMUSG00000026837	0.329355	0.00158184
Gpi1	ENSMUSG00000036427	0.781787	5.55499e-48
Otof	ENSMUSG00000062372	0.293782	0.00674359
Cfp	ENSMUSG00000001128	0.328736	0.0181828
Rreb1	ENSMUSG00000039087	0.309375	0.00691574
Eno1	ENSMUSG00000063524	0.720615	7.94504e-41
Acp6	ENSMUSG00000028093	0.465234	0.000155957
Gpr101	ENSMUSG00000036357	0.552348	0.00526389
Gls2	ENSMUSG00000044005	1.16426	6.07609e-11
Gm49327	ENSMUSG00000113536	0.371451	0.033585
Pcgf2	ENSMUSG00000018537	0.549132	3.85982e-08
Chac1	ENSMUSG00000027313	0.345671	0.00765718
Pex26	ENSMUSG00000067825	0.492683	1.29941e-13
Map3k21	ENSMUSG00000031853	0.802373	1.02864e-08
Sesn2	ENSMUSG00000028893	0.312474	1.86617e-06
Unc5b	ENSMUSG00000020099	1.3448	1.74963e-35
Adamts10	ENSMUSG00000024299	0.273904	0.0195462
Tmem74b	ENSMUSG00000044364	0.682695	4.40611e-05
Cygb	ENSMUSG00000020810	0.805906	2.99731e-41
Prrt4	ENSMUSG00000079654	0.398326	0.001267
Bid	ENSMUSG00000004446	0.337914	0.00173107
Piezo1	ENSMUSG00000014444	0.506568	3.53352e-05
Soat1	ENSMUSG00000026600	0.805106	2.2936e-27
Gigyf1	ENSMUSG00000029714	0.343373	1.66138e-06
Cybc1	ENSMUSG00000039294	0.384519	0.000301506
Trip10	ENSMUSG00000019487	0.482393	0.000217328
Sp7	ENSMUSG00000060284	0.512771	0.028475
Ebf4	ENSMUSG00000053552	0.398161	0.000520936
Igsf9	ENSMUSG00000037995	0.694044	1.30877e-06
Pgm1	ENSMUSG00000025791	0.766653	8.15914e-28
Tet1	ENSMUSG00000047146	0.609831	5.42183e-19
Grip2	ENSMUSG00000030098	0.269617	0.00121574
Nfil3	ENSMUSG00000056749	0.894719	2.81726e-25
Tpi1	ENSMUSG00000023456	0.600611	1.78229e-36
Vldlr	ENSMUSG00000024924	0.7343	2.57508e-67
Nphp3	ENSMUSG00000032558	0.56855	0.00116801
Stk10	ENSMUSG00000020272	0.638639	0.000368107
Plekhh3	ENSMUSG00000035172	0.46236	2.297e-09
Flcn	ENSMUSG00000032633	0.301834	1.05832e-05
Epha10	ENSMUSG00000028876	0.277964	0.00366372
Cavin2	ENSMUSG00000045954	0.560171	0.032824
Spring1	ENSMUSG00000032840	0.408273	1.02489e-07
Sh2b2	ENSMUSG00000005057	0.45192	3.76441e-05
Gm16008	ENSMUSG00000087381	0.531355	0.0344027
Maff	ENSMUSG00000042622	1.03299	1.05704e-11
Sh3pxd2a	ENSMUSG00000053617	0.76783	1.42264e-40
Chd2	ENSMUSG00000078671	0.795975	5.57736e-33
A230006K03Rik	ENSMUSG00000068151	0.518318	0.00243282
Eno1b	ENSMUSG00000059040	0.665094	3.97927e-14
Rabep2	ENSMUSG00000030727	0.320078	0.0147444
Armh4	ENSMUSG00000036242	0.72614	1.76134e-08
Tbc1d8b	ENSMUSG00000042473	0.657943	5.09508e-08
Zbtb7c	ENSMUSG00000044646	0.586636	9.15488e-11
Sirt4	ENSMUSG00000029524	0.321921	0.044835
Gm4735	ENSMUSG00000064193	0.66299	1.82352e-05
Sipa1l3	ENSMUSG00000030583	0.359375	5.19262e-07
Pgam1-ps2	ENSMUSG00000082016	0.486378	0.0206968
Spns2	ENSMUSG00000040447	0.553098	1.4513e-17
Rasl10a	ENSMUSG00000034209	0.57638	7.16553e-06
Lrp5	ENSMUSG00000024913	0.606034	2.70515e-13
Lcat	ENSMUSG00000035237	0.912997	4.45983e-08
Tmem268	ENSMUSG00000045917	0.599577	5.41933e-06
Wdr91	ENSMUSG00000058486	0.469747	1.47352e-08
Dpf1	ENSMUSG00000030584	0.643537	5.64763e-38
Nt5dc2	ENSMUSG00000071547	0.275567	0.0141358
Slc2a3	ENSMUSG00000003153	0.838091	1.1329e-86
Rarg	ENSMUSG00000001288	0.723958	2.88861e-08
C77080	ENSMUSG00000050390	0.758487	1.56867e-19
Abhd18	ENSMUSG00000037818	0.907539	9.41918e-19
Rnf165	ENSMUSG00000025427	0.589577	3.92632e-13
Ccdc137	ENSMUSG00000049957	0.382563	9.20299e-05
Lmln	ENSMUSG00000022802	0.385509	4.71244e-06
Zmiz1	ENSMUSG00000007817	0.279005	0.00019228
Kdm2a	ENSMUSG00000054611	0.565418	1.23378e-28
Rbm33	ENSMUSG00000048271	0.377777	2.32693e-08
Tbc1d31	ENSMUSG00000022364	0.385443	0.0130781
Uvssa	ENSMUSG00000037355	0.423129	3.11894e-05
Zfp395	ENSMUSG00000034522	1.13082	3.29778e-18
Trpm2	ENSMUSG00000009292	0.546511	8.11228e-10
Foxp4	ENSMUSG00000023991	0.567224	3.67033e-11
Tnk2	ENSMUSG00000022791	0.499324	2.50139e-17
Uaca	ENSMUSG00000034485	0.861464	2.34826e-14
AY036118	ENSMUSG00000118642	1.00264	6.35939e-25
Radil	ENSMUSG00000029576	0.601387	1.5293e-07
Rps6ka1	ENSMUSG00000003644	0.482016	3.55185e-05
Camsap3	ENSMUSG00000044433	0.314921	2.18638e-06
Plekhg5	ENSMUSG00000039713	0.324501	1.33731e-06
Pgk1	ENSMUSG00000062070	0.573227	1.71371e-34
Kbtbd11	ENSMUSG00000055675	0.709272	3.42523e-43
Fndc1	ENSMUSG00000071984	0.545207	4.56073e-09
Plod2	ENSMUSG00000032374	1.02887	1.42572e-34
Stac2	ENSMUSG00000017400	0.649982	1.63267e-07
Rnft1	ENSMUSG00000020521	0.608435	1.1405e-14
B3galnt2	ENSMUSG00000039242	0.397737	0.00180946
Sema3f	ENSMUSG00000034684	0.621973	5.85774e-11
Nampt	ENSMUSG00000020572	0.900755	6.77268e-41
Cux2	ENSMUSG00000042589	0.45771	3.34069e-13
Siah2	ENSMUSG00000036432	0.381735	4.47243e-07
Mif	ENSMUSG00000033307	0.352033	1.00699e-10
Tbkbp1	ENSMUSG00000038517	0.462159	9.83158e-15
Prkd2	ENSMUSG00000041187	0.527852	0.000844498
Megf6	ENSMUSG00000057751	0.380574	0.0133357
Map3k1	ENSMUSG00000021754	0.626922	4.62678e-14
Grhpr	ENSMUSG00000035637	0.387923	0.00287515
Per1	ENSMUSG00000020893	0.584733	1.29208e-21
Cntfr	ENSMUSG00000028444	0.55515	2.00594e-15
Nkd1	ENSMUSG00000031661	0.305427	0.0378631
Wdcp	ENSMUSG00000051721	0.347327	0.00486382
Pafah1b3	ENSMUSG00000005447	0.401323	0.000152554
Bag2	ENSMUSG00000042215	0.321102	0.00746316
Tmem63a	ENSMUSG00000026519	0.565847	0.000136089
Kctd7	ENSMUSG00000034110	0.317111	0.000613361
Padi2	ENSMUSG00000028927	0.498707	0.0218496
Map3k4	ENSMUSG00000014426	0.30032	3.26746e-07
Bcl9l	ENSMUSG00000063382	0.339704	1.58499e-10
Map2k6	ENSMUSG00000020623	0.430208	0.00153241
Ptcd1	ENSMUSG00000029624	0.342709	0.000331498
Tpi-rs11	ENSMUSG00000106755	0.572931	0.0100474
Dvl2	ENSMUSG00000020888	0.354235	0.000182376
Plxdc1	ENSMUSG00000017417	0.428377	0.0328956
Plvap	ENSMUSG00000034845	0.543016	0.00832216
Zfp654	ENSMUSG00000047141	0.621954	2.10738e-14
Bhlhe40	ENSMUSG00000030103	0.800342	2.69217e-35
Slc16a1	ENSMUSG00000032902	0.724138	7.71519e-28
Cbfa2t3	ENSMUSG00000006362	0.526166	4.13023e-11
Rassf1	ENSMUSG00000010067	0.619895	9.54445e-06
Mroh1	ENSMUSG00000022558	0.362693	1.30182e-12
Nos1	ENSMUSG00000029361	0.263884	0.000385764
Rere	ENSMUSG00000039852	0.379697	5.38741e-10
Pgam1	ENSMUSG00000011752	0.531013	1.38314e-27
Dclk3	ENSMUSG00000032500	0.605058	4.24962e-13
Colgalt2	ENSMUSG00000032649	0.490747	0.00431985
Mef2d	ENSMUSG00000001419	0.28368	1.62436e-08
Hjurp	ENSMUSG00000044783	0.367419	6.22658e-05
Slc19a2	ENSMUSG00000040918	0.393884	1.37045e-06
Rassf5	ENSMUSG00000026430	0.597322	1.76318e-16
Nkd2	ENSMUSG00000021567	0.516854	5.13845e-05
Tbc1d1	ENSMUSG00000029174	0.340774	0.000273069
Neu1	ENSMUSG00000007038	0.292063	4.70114e-05
Trerf1	ENSMUSG00000064043	0.493792	5.62404e-09
Ugdh	ENSMUSG00000029201	0.557867	3.66168e-12
Ripor1	ENSMUSG00000038604	0.358243	9.97264e-11
Atg2b	ENSMUSG00000041341	0.502314	2.65206e-22
Lonp1	ENSMUSG00000041168	0.342263	4.59845e-11
Auts2	ENSMUSG00000029673	0.278874	2.90498e-06
Esyt1	ENSMUSG00000025366	0.439782	0.00725944
Mideas	ENSMUSG00000042507	0.769988	1.63647e-25
Slc19a1	ENSMUSG00000001436	0.351642	0.000197495
Rtl5	ENSMUSG00000049191	0.483855	3.80663e-08
Casp6	ENSMUSG00000027997	0.355702	0.0460685
Ypel4	ENSMUSG00000034059	0.27012	0.00760267
Sh2d3c	ENSMUSG00000059013	0.384152	3.44592e-06
Slc44a5	ENSMUSG00000028360	0.622952	1.76318e-16
Camkk1	ENSMUSG00000020785	0.499284	1.55959e-10
Vhl	ENSMUSG00000033933	0.392066	7.47601e-13
Slc29a2	ENSMUSG00000024891	0.312602	0.00131026
Zbtb7b	ENSMUSG00000028042	0.399888	0.00100115
Rnf208	ENSMUSG00000044628	0.526403	8.37011e-14
Prelid3a	ENSMUSG00000024530	0.583681	6.06575e-14
Gmppa	ENSMUSG00000033021	0.367325	0.000108917
Rnf217	ENSMUSG00000063760	0.692256	3.27578e-24
2700097O09Rik	ENSMUSG00000062198	0.560131	0.00226506
Rubcn	ENSMUSG00000035629	0.393505	5.53636e-18
Trip6	ENSMUSG00000023348	0.30113	0.0138937
Lrtm2	ENSMUSG00000055003	0.386335	7.30743e-12
Syt7	ENSMUSG00000024743	0.313217	1.53147e-09
Ruvbl2	ENSMUSG00000003868	0.383874	1.8365e-06
Bcar1	ENSMUSG00000031955	0.568956	8.0324e-28
N4bp3	ENSMUSG00000001053	0.809843	9.14791e-13
Usp35	ENSMUSG00000035713	0.451376	0.000148114
Neurod2	ENSMUSG00000038255	0.618736	7.35923e-18
Mrpl45	ENSMUSG00000018882	0.681176	3.24875e-22
Gadd45g	ENSMUSG00000021453	0.844286	1.80261e-11
Rab3ip	ENSMUSG00000064181	0.601172	2.45854e-16
Tet3	ENSMUSG00000034832	0.299774	4.1479e-11
Ksr1	ENSMUSG00000018334	0.545107	1.45504e-26
2310022B05Rik	ENSMUSG00000031983	0.364151	0.000615768
Gga2	ENSMUSG00000030872	0.431695	1.89579e-09
Arhgef17	ENSMUSG00000032875	0.347025	2.96568e-13
Cysrt1	ENSMUSG00000036731	0.560406	0.000312863
Sox11	ENSMUSG00000063632	0.270846	0.000170299
Clmn	ENSMUSG00000021097	0.509074	1.57865e-10
A2m	ENSMUSG00000030111	0.474785	6.53556e-06
Pou2f2	ENSMUSG00000008496	0.437929	0.00029499
Dbndd1	ENSMUSG00000031970	0.292713	0.0040199
Herpud1	ENSMUSG00000031770	0.375595	5.13783e-07
Aldh9a1	ENSMUSG00000026687	0.381016	1.44608e-05
Dtx1	ENSMUSG00000029603	0.36191	5.68545e-15
Zbtb40	ENSMUSG00000060862	0.309881	0.00336044
Arfgap3	ENSMUSG00000054277	0.297672	0.000831088
Armcx1	ENSMUSG00000033460	0.372964	2.33835e-10
Bend5	ENSMUSG00000028545	0.685239	7.34634e-07
Gtf2ird1	ENSMUSG00000023079	0.358613	1.09285e-06
Tshz3	ENSMUSG00000021217	0.617885	1.83966e-15
Mical3	ENSMUSG00000051586	0.313388	7.08601e-10
Cpeb1	ENSMUSG00000025586	0.493304	5.5908e-08
Armcx6	ENSMUSG00000050394	0.386834	0.0146044
Gfra2	ENSMUSG00000022103	0.285601	0.0139741
Rlf	ENSMUSG00000049878	0.607382	1.89438e-24
Ddit3	ENSMUSG00000025408	0.841046	3.221e-19
Thsd4	ENSMUSG00000032289	0.302098	0.0366027
Seh1l	ENSMUSG00000079614	0.465477	4.11971e-13
Zfp383	ENSMUSG00000099689	0.404769	0.000895966
Hk1	ENSMUSG00000037012	0.610659	1.79603e-45
Bbc3	ENSMUSG00000002083	0.55387	1.45107e-15
Bhlhe41	ENSMUSG00000030256	1.19352	1.69871e-44
Bsn	ENSMUSG00000032589	0.340391	6.7357e-10
Nars2	ENSMUSG00000018995	0.349023	0.00410432
Tbc1d24	ENSMUSG00000036473	0.282433	2.2376e-06
Nfkbiz	ENSMUSG00000035356	0.80566	4.19445e-15
Dnajc21	ENSMUSG00000044224	0.320894	0.00916676
Rora	ENSMUSG00000032238	0.995394	8.59981e-44
Tspan18	ENSMUSG00000027217	0.482001	1.49607e-07
Slc25a28	ENSMUSG00000040414	0.303256	0.00333003
Foxo6	ENSMUSG00000052135	0.442596	1.12579e-16
Upf2	ENSMUSG00000043241	0.544379	8.91599e-08
Cbx7	ENSMUSG00000053411	0.538623	3.62897e-08
Slc30a10	ENSMUSG00000026614	0.279302	0.0019884
Zfpm1	ENSMUSG00000049577	0.484556	4.16792e-07
Crot	ENSMUSG00000003623	0.612539	1.80855e-19
Ppard	ENSMUSG00000002250	0.346917	0.000743948
Crlf1	ENSMUSG00000007888	0.506802	5.62649e-07
Cnnm1	ENSMUSG00000025189	0.43398	2.2852e-09
Mpp3	ENSMUSG00000052373	0.544621	1.60999e-11
Npas1	ENSMUSG00000001988	0.355423	6.75007e-05
