# Supplementary material for: Transcriptional Responses of Different Brain Cell Types to Oxygen Decline
Source: Brain Sci. 2024 Mar 30;14(4):341. doi: 10.3390/brainsci14040341 (PMC11048388; doi:10.3390/brainsci14040341)
Supplement: Supplementary file 1 [file brainsci-14-00341-s001.zip › TableS2.xlsx]

## Sheet: Sheet1
158 common genes between 5v21 and 1v5 up regulated						13 common genes between 5v21 and 1v5 up downregulated
gene_name	gene_id	log2FoldChange	padj			gene_name	gene_id	log2FoldChange	padj
Ankrd37	ENSMUSG00000050914	2.45842	7.68302e-43			Rn18s-rs5	ENSMUSG00000119584	-0.376516	0.00719315
Slc16a3	ENSMUSG00000025161	3.53952	2.10706e-78			Txnip	ENSMUSG00000038393	-0.602843	3.43221e-14
F630040K05Rik	ENSMUSG00000097727	2.46082	2.10739e-26			Atoh8	ENSMUSG00000037621	-1.08598	1.34825e-14
Ppp1r3g	ENSMUSG00000050423	2.43674	3.27877e-46			Pde7b	ENSMUSG00000019990	-0.510293	0.00300287
Smtnl2	ENSMUSG00000045667	3.45806	4.24539e-23			Nop9	ENSMUSG00000019297	-0.347363	4.15743e-05
Vegfa	ENSMUSG00000023951	2.11676	1.14001e-151			Arrdc4	ENSMUSG00000042659	-0.598141	2.18591e-14
Rgs11	ENSMUSG00000024186	1.41321	1.66674e-29			Slc43a2	ENSMUSG00000038178	-0.477052	4.23701e-11
Pfkl	ENSMUSG00000020277	1.60567	4.59801e-151			Tfeb	ENSMUSG00000023990	-0.421639	0.000303762
Gm49759	ENSMUSG00000111394	1.13538	2.15729e-34			Npm3	ENSMUSG00000056209	-0.281864	0.0235526
Fam184b	ENSMUSG00000015879	2.14387	2.09396e-41			Dbx2	ENSMUSG00000045608	-0.903081	1.44128e-10
Narf	ENSMUSG00000000056	0.317644	3.43748e-05			Sesn1	ENSMUSG00000038332	-0.331454	2.13141e-05
Neat1	ENSMUSG00000092274	1.0042	3.32213e-11			Camk2a	ENSMUSG00000024617	-0.448823	4.87551e-09
Pdk1	ENSMUSG00000006494	2.14274	5.21917e-61			Zfp365	ENSMUSG00000037855	-0.407457	1.51637e-07
Gm28863	ENSMUSG00000099803	1.26441	4.2436e-06
Proser2	ENSMUSG00000045319	2.57463	7.87061e-37
Ak4	ENSMUSG00000028527	1.59665	1.48292e-164
Gapdhs	ENSMUSG00000061099	1.3064	9.31414e-06
Abhd18	ENSMUSG00000037818	1.91121	2.12009e-55
Bnip3	ENSMUSG00000078566	2.83155	2.5632e-237
Egln3	ENSMUSG00000035105	2.28939	2.04044e-152
Ciart	ENSMUSG00000038550	2.06553	3.47095e-56
Gm16008	ENSMUSG00000087381	1.38708	8.73478e-16
Necab3	ENSMUSG00000027489	1.83905	1.45142e-36
Car9	ENSMUSG00000028463	2.04459	1.45917e-52
Gm37090	ENSMUSG00000103183	1.41077	9.632e-18
Appl2	ENSMUSG00000020263	1.73104	2.9938e-117
Amz1	ENSMUSG00000050022	1.37935	4.55605e-10
Syt15	ENSMUSG00000041479	0.405696	0.0197293
Tpi-rs11	ENSMUSG00000106755	1.20271	2.836e-10
Rcor2	ENSMUSG00000024968	2.63681	5.67967e-75
Stc2	ENSMUSG00000020303	2.33464	3.92813e-150
Tnfrsf18	ENSMUSG00000041954	1.40735	3.43343e-16
Ldha	ENSMUSG00000063229	1.45673	1.03148e-115
Jmjd6	ENSMUSG00000056962	1.19236	2.85825e-88
Pgbd1	ENSMUSG00000055313	2.36719	2.4341e-43
Lmbr1l	ENSMUSG00000022999	0.477325	0.000356976
Tnfsf9	ENSMUSG00000035678	1.8082	7.86462e-19
Spaca6	ENSMUSG00000080316	0.394445	0.00286897
Kdm3a	ENSMUSG00000053470	0.747556	1.56042e-33
Ldha-ps2	ENSMUSG00000083836	0.786354	0.000211791
Ero1a	ENSMUSG00000021831	3.29493	1.72485e-137
Adora2a	ENSMUSG00000020178	2.15278	2.25257e-68
Gys1	ENSMUSG00000003865	1.98162	2.50357e-271
Plin4	ENSMUSG00000002831	0.614242	0.00585987
Vldlr	ENSMUSG00000024924	2.14286	2.0701e-192
Apln	ENSMUSG00000037010	2.38315	2.82647e-74
Cyp24a1	ENSMUSG00000038567	0.328556	0.00262487
Hey2	ENSMUSG00000019789	1.13598	2.10963e-08
Gpi-ps	ENSMUSG00000043192	1.65382	1.88795e-26
P4ha2	ENSMUSG00000018906	2.63287	1.29913e-250
Rgs22	ENSMUSG00000037627	0.492165	0.000902955
Adm	ENSMUSG00000030790	1.44721	4.20191e-156
Inha	ENSMUSG00000032968	1.47383	5.31948e-20
Ppp1r3b	ENSMUSG00000046794	2.37823	1.0719e-96
Nphp3	ENSMUSG00000032558	1.06945	1.55251e-14
1700001L05Rik	ENSMUSG00000075511	1.01704	4.10148e-08
Tpi1	ENSMUSG00000023456	1.34844	2.21055e-103
Kbtbd11	ENSMUSG00000055675	1.37733	1.80707e-73
Greb1	ENSMUSG00000036523	0.342823	0.0381355
Aspg	ENSMUSG00000037686	0.608003	0.000133077
Slc2a1	ENSMUSG00000028645	2.14441	1.94862e-280
Gpi1	ENSMUSG00000036427	1.76428	1.34518e-230
Atxn7l2	ENSMUSG00000048997	1.90018	8.17905e-47
Ddit4	ENSMUSG00000020108	1.60395	1.40264e-80
Zfhx2	ENSMUSG00000040721	0.465531	0.00732739
1700094D03Rik	ENSMUSG00000118506	0.388824	0.0193361
Gigyf1	ENSMUSG00000029714	0.277607	0.0385088
Jakmip3	ENSMUSG00000056856	1.85011	5.11244e-56
G2e3	ENSMUSG00000035293	1.52136	3.20251e-80
Npas1	ENSMUSG00000001988	1.15657	6.23414e-24
Sema4g	ENSMUSG00000025207	0.719012	3.25989e-13
Ankzf1	ENSMUSG00000026199	0.695001	5.86277e-15
Crocc	ENSMUSG00000040860	1.1368	1.02926e-31
Hk2	ENSMUSG00000000628	1.9257	7.8014e-212
Ppox	ENSMUSG00000062729	0.446452	8.34083e-05
Hilpda	ENSMUSG00000043421	3.03891	2.58364e-200
Eno1	ENSMUSG00000063524	1.27358	5.51321e-128
Cacna1h	ENSMUSG00000024112	2.38044	1.37938e-201
Gtpbp2	ENSMUSG00000023952	0.329412	1.51411e-05
Fgf11	ENSMUSG00000042826	2.6801	4.92315e-120
Unc13a	ENSMUSG00000034799	1.12416	3.56609e-21
Gm867	ENSMUSG00000050157	0.66993	1.53765e-07
Slc37a4	ENSMUSG00000032114	1.41276	2.17231e-77
Kcnc3	ENSMUSG00000062785	1.36748	1.64664e-32
Apbb3	ENSMUSG00000117679	0.391996	0.0171423
Bhlhe40	ENSMUSG00000030103	1.47324	9.459e-127
P4ha1	ENSMUSG00000019916	0.717348	1.02543e-42
Dennd4b	ENSMUSG00000042404	0.707433	3.57128e-15
Atp7b	ENSMUSG00000006567	1.35412	1.23407e-58
Map3k1	ENSMUSG00000021754	0.979141	2.61444e-22
Kdm4b	ENSMUSG00000024201	1.01416	9.86086e-76
Sap30bpos	ENSMUSG00000087064	0.610901	0.000207066
Gm4735	ENSMUSG00000064193	1.50889	2.25505e-47
Plppr3	ENSMUSG00000035835	0.531263	2.30834e-07
Tbl2	ENSMUSG00000005374	1.70826	2.59843e-111
Eno1b	ENSMUSG00000059040	1.26538	2.37622e-70
Osbpl10	ENSMUSG00000040875	1.26621	8.90045e-34
Ccng2	ENSMUSG00000029385	1.51955	1.61674e-91
Ier3	ENSMUSG00000003541	2.22024	2.225e-244
Cacnb1	ENSMUSG00000020882	0.642281	3.63256e-09
Pcgf2	ENSMUSG00000018537	0.435851	1.34396e-05
Eno2	ENSMUSG00000004267	0.582838	8.82902e-11
Ulk3	ENSMUSG00000032308	0.867037	2.46045e-16
Rlf	ENSMUSG00000049878	0.638377	5.56035e-17
Tbc1d24	ENSMUSG00000036473	0.570924	1.81019e-11
Slc38a2	ENSMUSG00000022462	0.852179	3.72705e-29
Zmynd8	ENSMUSG00000039671	0.660258	3.12374e-33
Kdm6b	ENSMUSG00000018476	0.687461	8.60906e-11
Zfp395	ENSMUSG00000034522	1.43569	2.84641e-62
Pnrc1	ENSMUSG00000040128	1.3498	7.56631e-105
Ccdc57	ENSMUSG00000048445	0.417136	0.00516574
Alkbh5	ENSMUSG00000042650	0.825215	6.71083e-68
Fam162a	ENSMUSG00000003955	2.21755	1.53917e-154
Piga	ENSMUSG00000031381	0.874701	4.73281e-13
Acp6	ENSMUSG00000028093	0.936775	4.4914e-29
Bnip3l	ENSMUSG00000022051	1.75947	1.68077e-175
Safb2	ENSMUSG00000042625	0.37842	9.08098e-05
Mthfd1l	ENSMUSG00000040675	2.21465	1.37145e-254
Zfp654	ENSMUSG00000047141	0.782728	5.89994e-22
Tbc1d8b	ENSMUSG00000042473	1.38577	1.35226e-35
Zfp292	ENSMUSG00000039967	0.627318	2.9305e-12
Per2	ENSMUSG00000055866	0.337677	0.00271812
Slc2a3	ENSMUSG00000003153	2.22007	1.00158e-233
Plod2	ENSMUSG00000032374	1.11839	3.00738e-90
Adamtsl5	ENSMUSG00000043822	1.45882	3.30799e-64
Nod1	ENSMUSG00000038058	0.802483	3.26671e-12
Col7a1	ENSMUSG00000025650	0.371262	0.000585491
Pim2	ENSMUSG00000031155	1.12193	2.12392e-44
Egln1	ENSMUSG00000031987	1.92484	8.52029e-188
Cntnap1	ENSMUSG00000017167	0.391225	0.00870613
Begain	ENSMUSG00000040867	0.267857	0.0282514
Rara	ENSMUSG00000037992	1.86717	6.00722e-119
Ntsr2	ENSMUSG00000020591	0.869815	1.34239e-29
Sertm1	ENSMUSG00000056306	0.465514	1.63512e-05
Tbkbp1	ENSMUSG00000038517	0.615927	7.03574e-09
Mapk8ip3	ENSMUSG00000024163	0.36578	1.75527e-07
Lcat	ENSMUSG00000035237	1.04775	1.12504e-56
Flcn	ENSMUSG00000032633	0.280256	0.00069108
Fmo1	ENSMUSG00000040181	0.370031	0.00616782
Ppp1r3c	ENSMUSG00000067279	1.20687	5.39186e-54
Soat1	ENSMUSG00000026600	0.97217	1.03919e-61
Ndrg1	ENSMUSG00000005125	3.311	2.69689e-114
Whamm	ENSMUSG00000045795	0.700412	7.53786e-14
Sema5b	ENSMUSG00000052133	0.846719	1.27846e-66
Lonrf3	ENSMUSG00000016239	1.02894	8.36415e-40
Porcn	ENSMUSG00000031169	0.556592	2.71259e-08
Ctns	ENSMUSG00000005949	0.291055	0.00661821
Ppp1r13l	ENSMUSG00000040734	0.584688	2.38844e-10
Galk1	ENSMUSG00000020766	1.3894	7.63884e-54
Vhl	ENSMUSG00000033933	1.12657	1.99641e-68
Cnot7	ENSMUSG00000031601	0.668353	4.57365e-28
Rora	ENSMUSG00000032238	0.784495	8.61106e-20
Seh1l	ENSMUSG00000079614	0.831193	4.20776e-53
Wsb1	ENSMUSG00000017677	0.715517	1.21439e-06
Cpeb1	ENSMUSG00000025586	0.41269	4.12583e-05
Prkab2	ENSMUSG00000038205	1.45308	7.9562e-78
Haghl	ENSMUSG00000061046	0.356417	3.11894e-07
Mif	ENSMUSG00000033307	1.22704	1.21562e-70
