# Supplementary material for: Transcriptional Responses of Different Brain Cell Types to Oxygen Decline
Source: Brain Sci. 2024 Mar 30;14(4):341. doi: 10.3390/brainsci14040341 (PMC11048388; doi:10.3390/brainsci14040341)
Supplement: Supplementary file 1 [file brainsci-14-00341-s001.zip › TableS3.xlsx]

## Sheet: Sheet1
73 common genes between 5v21 and 1v5 up regulated						4 common genes between 5v21 and 1v5 up downregulated
gene_name	gene_id	log2FoldChange	padj			gene_name	gene_id	log2FoldChange	padj
Ankrd37	ENSMUSG00000050914	3.27292	7.77769e-117			BE692007	ENSMUSG00000099757	-0.584462	0.0247583
Ak4	ENSMUSG00000028527	3.37935	3.50401e-101			Coq8a	ENSMUSG00000026489	-0.66706	0.00505946
Rgs11	ENSMUSG00000024186	2.31037	7.44303e-25			Tars2	ENSMUSG00000028107	-0.620832	0.000325628
Pdk1	ENSMUSG00000006494	1.52254	1.88576e-46			Ntpcr	ENSMUSG00000031851	-0.411792	0.0279443
Egln3	ENSMUSG00000035105	3.84941	1.87575e-303
Pfkl	ENSMUSG00000020277	1.82811	4.13991e-57
Slc16a3	ENSMUSG00000025161	2.39469	4.54119e-86
Stc2	ENSMUSG00000020303	2.53331	5.20417e-07
Bnip3	ENSMUSG00000078566	3.54632	2.6871e-257
Tnfsf9	ENSMUSG00000035678	1.74805	1.00633e-17
Pgam1	ENSMUSG00000011752	1.5555	1.46499e-47
Tpi1	ENSMUSG00000023456	2.18007	8.0029e-64
Cd274	ENSMUSG00000016496	0.836343	7.186e-06
Slc2a1	ENSMUSG00000028645	2.67543	3.92374e-187
Ccr1	ENSMUSG00000025804	0.647555	0.0330943
Bhlhe41	ENSMUSG00000030256	0.554432	0.000108073
Pgam1-ps2	ENSMUSG00000082016	1.44274	9.01521e-12
Abhd18	ENSMUSG00000037818	1.19096	7.37683e-06
Pgk1	ENSMUSG00000062070	1.93605	8.85311e-72
Rnf128	ENSMUSG00000031438	0.338105	0.0162782
Shb	ENSMUSG00000044813	0.445066	0.023926
Pgm1	ENSMUSG00000025791	2.38648	4.6813e-97
Egln1	ENSMUSG00000031987	2.4218	1.96464e-99
Zfp503	ENSMUSG00000039081	0.519659	0.00927723
Grhpr	ENSMUSG00000035637	1.80373	6.60034e-30
Dubr	ENSMUSG00000022639	1.23923	4.13537e-19
Ldha	ENSMUSG00000063229	1.94605	1.93154e-70
Snx25	ENSMUSG00000038291	0.788181	5.55748e-08
Rhov	ENSMUSG00000034226	0.915513	0.000283454
Eno1b	ENSMUSG00000059040	1.91309	3.63784e-39
Ppp1r13l	ENSMUSG00000040734	0.629671	0.0035782
Alkbh5	ENSMUSG00000042650	0.556699	7.08377e-05
Epm2a	ENSMUSG00000055493	1.30636	6.98109e-14
Gys1	ENSMUSG00000003865	2.62212	4.01723e-136
Dusp4	ENSMUSG00000031530	0.767087	0.000761064
Kdm3a	ENSMUSG00000053470	1.09831	3.25467e-14
Hk2	ENSMUSG00000000628	1.27697	1.02783e-24
Gbe1	ENSMUSG00000022707	2.09273	1.21674e-45
Ampd3	ENSMUSG00000005686	0.915128	9.60999e-11
Jun	ENSMUSG00000052684	0.349147	0.0039036
Nanos1	ENSMUSG00000072437	0.58223	0.00587971
Aldoa	ENSMUSG00000030695	1.39433	9.19818e-34
Pnrc1	ENSMUSG00000040128	0.79826	5.26923e-14
Rbpj	ENSMUSG00000039191	0.635732	3.26259e-06
Lgals3	ENSMUSG00000050335	0.457492	0.00838425
Eno1	ENSMUSG00000063524	1.92663	5.43046e-59
Ero1a	ENSMUSG00000021831	2.92005	3.01846e-94
Agl	ENSMUSG00000033400	0.451801	0.010839
Gclc	ENSMUSG00000032350	1.03994	4.21248e-10
Ppp1r15a	ENSMUSG00000040435	0.644529	5.68874e-06
Higd1a	ENSMUSG00000038412	2.30319	3.49335e-34
Galnt6	ENSMUSG00000037280	0.36076	0.0126416
Amz1	ENSMUSG00000050022	1.0435	3.3576e-10
P4ha1	ENSMUSG00000019916	1.42645	9.33105e-71
Pfkfb3	ENSMUSG00000026773	1.13377	1.0365e-21
Npepps	ENSMUSG00000001441	0.325767	0.0186333
Kdm4b	ENSMUSG00000024201	1.10442	4.74366e-24
Cdk18	ENSMUSG00000026437	0.44441	0.000110698
Hmox1	ENSMUSG00000005413	3.36446	7.15415e-225
Mylip	ENSMUSG00000038175	0.484049	0.0016369
Pkm	ENSMUSG00000032294	1.10116	4.12134e-21
Ccdc115	ENSMUSG00000042111	0.360107	0.0305944
Gpi1	ENSMUSG00000036427	1.64223	1.60634e-54
Thap7	ENSMUSG00000022760	0.541369	0.00104704
Pgp	ENSMUSG00000043445	1.04971	2.47744e-14
Ccng2	ENSMUSG00000029385	0.675552	8.31458e-09
Map2k1	ENSMUSG00000004936	1.06196	4.33498e-32
Btg1	ENSMUSG00000036478	0.508814	1.20814e-06
Hk1	ENSMUSG00000037012	1.71325	1.30912e-55
Eaf1	ENSMUSG00000021890	0.727339	2.36573e-09
Mcl1	ENSMUSG00000038612	0.313332	0.00351316
Pfkp	ENSMUSG00000021196	1.50517	3.38784e-49
Gclm	ENSMUSG00000028124	2.04329	3.00328e-89
