# Supplementary material for: Transcriptional Responses of Different Brain Cell Types to Oxygen Decline
Source: Brain Sci. 2024 Mar 30;14(4):341. doi: 10.3390/brainsci14040341 (PMC11048388; doi:10.3390/brainsci14040341)
Supplement: Supplementary file 1 [file brainsci-14-00341-s001.zip › TableS4.xlsx]

## Sheet: sTable 4
5v21 Overlap 3 cell-types (51)		1v5 Overlap 3 cell-types (507)		Overlap 5v21/1v5 of all 3 cell-types (28)
Abhd18		2310022B05Rik		Abhd18
Ak4		2500002B13Rik		Ak4
Akap8		2700097O09Rik		Akap8
Alkbh5		A930004J17Rik		Alkbh5
Amz1		Aatk		Amz1
Ankrd37		Abcc1		Ankrd37
Atoh8		Abhd18		Bnip3
Bnip3		Acss1		Egln1
Egln1		Adamts10		Egln3
Egln3		Adamtsl5		Eno1
Eno1		Adm		Eno1b
Eno1b		Aebp1		Ero1a
Ero1a		Aig1		Gpi1
Fam76b		Ak3l2-ps		Gys1
Fnbp4		Ak4		Hk2
Gm49759		Akap17b		Kdm3a
Gpi1		Akap8		Kdm4b
Gys1		Aldoa		Ldha
Hk2		Alkbh5		P4ha1
Kdm3a		Amz1		Pdk1
Kdm4b		Angpt1		Pfkl
Kmt2b		Angptl2		Ppp1r13l
Ldha		Ankle1		Rgs11
Leng8		Ankrd37		Slc16a3
Lonrf3		Anp32a		Slc2a1
Mbd6		Apba3		Stc2
Med12		Apln		Tnfsf9
Narf		Appl2		Tpi1
P4ha1		Arfgap3
Pdk1		Arhgap23
Pfkl		Arhgap29
Ppp1r13l		Arhgef7
Rgs11		Armcx1
Rlf		Armh4
Safb2		Arrb1
Slc16a3		Arrdc3
Slc2a1		Ascl2
Slc38a2		Asf1b
Snapc4		Aspm
Spaca6		Ass1
Srek1		Atf3
Srrt		Atf7ip
Stc2		Atg9b
Tlcd1		Atp7b
Tnfsf9		Atxn7l2
Tpi1		B4galt5
Txnip		Bag2
Wdr62		Bard1
Zfhx2		Bcar1
Zfp654		Bend5
Zfyve26		Bhlhe40
		Bhlhe41
		Bicc1
		Birc5
		Bmp2k
		Bnip3
		Bnip3l
		Bnip3l-ps
		Bsg
		Btbd3
		Btg1
		C1galt1
		Cacna1h
		Casp6
		Cbfb
		Ccbe1
		Ccdc115
		Ccdc58
		Ccna2
		Ccnb1
		Ccnd3
		Ccng2
		Ccnyl1
		Cdc20
		Cdca5
		Cdca8
		Cdh11
		Cdk1
		Cdkn1b
		Cdkn2b
		Cebpb
		Cebpz
		Cenpf
		Chac1
		Chfr
		Chst7
		Ciapin1
		Ciart
		Cirbp
		Ckap2
		Ckap2l
		Cln5
		Clspn
		Clybl
		Cnnm4
		Cntrl
		Coq10b
		Creg2
		Crlf1
		Cse1l
		Ctsf
		Cxxc5
		Ddit4
		Ddx21
		Dffa
		Dgat2
		Dgcr8
		Dhx29
		Dicer1
		Dido1
		Dipk2a
		Dkc1
		Dnajc21
		Dpf1
		Dtl
		Dubr
		Dusp1
		E2f2
		E2f7
		Ebf4
		Eef1aknmt
		Efnb2
		Egln1
		Egln3
		Eif1b
		Elac2
		Ell
		Elof1
		Emilin1
		Eno1
		Eno1b
		Epm2a
		Ero1a
		Errfi1
		Espl1
		Etv1
		Exo1
		F3
		Fam162a
		Fam53b
		Fanca
		Fbxl7
		Fbxo21
		Fbxo5
		Fdft1
		Fdx1
		Fgd4
		Fgf11
		Fibcd1
		Fignl1
		Flcn
		Fn3krp
		Fnip1
		Fos
		Foxm1
		Foxn3
		Foxred2
		Ftsj3
		Gadd45b
		Gadd45g
		Galk1
		Galnt7
		Gart
		Gbe1
		Gdpd5
		Gfpt2
		Gigyf1
		Gipr
		Gls2
		Gm12868
		Gm16008
		Gm16185
		Gm2011
		Gm2115
		Gm4735
		Gm7336
		Gmppa
		Gpatch2
		Gpi1
		Grhpr
		Gt(ROSA)26Sor
		Gtf2e2
		Gys1
		H1f2
		H2-Ab1
		H2-T-ps
		Heatr1
		Herpud1
		Hey2
		Higd1a
		Hilpda
		Hk1
		Hk2
		Hmox1
		Hnrnph1
		Hspa8
		Htr2a
		Ier3
		Ier5l
		Incenp
		Inka2
		Inpp1
		Insig2
		Ints6l
		Itga6
		Jmjd6
		Jpt2
		Jun
		Junb
		Jund
		Kbtbd11
		Kcng2
		Kcnj10
		Kcnj2
		Kctd12
		Kdm3a
		Kdm4b
		Kdm5b
		Kdm6b
		Kif11
		Kif15
		Kif20a
		Kif20b
		Klhl3
		Kntc1
		Kpna2
		Kti12
		Lama4
		Lcat
		Ldha
		Ldha-ps2
		Ldlrap1
		Lfng
		Lgals3
		Limd2
		Lingo1
		Lingo3
		Lmnb1
		Lonp1
		Lox
		Loxl1
		Loxl2
		Lsm2
		Maff
		Man1c1
		Mboat2
		Mcm2
		Mcm3
		Mcm4
		Mcm5
		Mcm6
		Mcm7
		Mdn1
		Megf6
		Mettl21a
		Mgarp
		Mid1ip1
		Mif
		Mis18bp1
		Mki67
		Mnat1
		Mphosph6
		Mrc2
		Mrpl45
		Msmo1
		Mt1
		Mthfd1l
		Muc2
		Mxi1
		Mycl
		Myo1b
		Naa25
		Nadk2
		Naglu
		Nampt
		Nbl1
		Ncapg
		Ncaph
		Ndc80
		Ndrg1
		Ndufa4l2
		Neat1
		Nefm
		Neurl2
		Nfil3
		Ninj1
		Noc3l
		Nol9
		Nop9
		Nrep
		Nt5dc2
		Nufip1
		Nusap1
		Nxf1
		Nxph4
		Ociad2
		Orc2
		Osgepl1
		Oxsr1
		P4ha1
		P4ha2
		Pafah1b3
		Pbk
		Pcdh19
		Pcgf5
		Pcid2
		Pclaf
		Pcmtd1
		Pdcd4
		Pdk1
		Pdk3
		Pdlim4
		Pdxp
		Pdzrn3
		Pfkfb3
		Pfkl
		Pfkp
		Pgam1
		Pgam1-ps2
		Pgk1
		Pgm1
		Phf19
		Phlda1
		Phlpp2
		Pik3ip1
		Pim2
		Pkm
		Pkp2
		Pla2g12a
		Plagl2
		Plcxd1
		Plekha2
		Plk4
		Plod2
		Plxdc1
		Plxna4
		Pnrc1
		Pogk
		Pole
		Polr1b
		Polr2d
		Polr3b
		Ppard
		Ppm1d
		Ppm1k
		Ppme1
		Ppp1r13l
		Ppp1r15a
		Ppp1r3c
		Ppp1r3g
		Prelid1
		Prelid2
		Prkab2
		Proser2
		Prr15
		Prxl2c
		Ptar1
		Pvr
		Pxdc1
		Qtrt2
		Rab33a
		Rad51
		Radil
		Rasl11a
		Rassf1
		Rassf2
		Rbpms
		Rcor2
		Recql
		Rgs11
		Rhbdf1
		Rn18s-rs5
		Rnf13
		Rnf181
		Rnf19a
		Rnf217
		Rnft1
		Rora
		Rps6ka1
		Rps6ka5
		Rras
		Rrm1
		Rrm2
		Rrs1
		Rsph9
		Rtn4ip1
		Rtn4rl2
		Ruvbl2
		S1pr1
		Sap30
		Sat1
		Sccpdh
		Sdc4
		Seh1l
		Selenbp1
		Sema6a
		Serpine1
		Serping1
		Sertad1
		Sesn1
		Sesn2
		Setd1b
		Sgms2
		Sh2b2
		Shb
		Siah2
		Sil1
		Sirt1
		Skp2
		Slc16a3
		Slc22a4
		Slc23a2
		Slc27a3
		Slc29a2
		Slc2a1
		Slc2a3
		Slc37a4
		Slc38a9
		Slc9a3r1
		Slc9a7
		Slfn9
		Slit3
		Smad7
		Smc4
		Smpdl3b
		Smtnl2
		Sncaip
		Sntb2
		Snx21
		Snx7
		Soat1
		Sorbs1
		Spats2
		Spg21
		Sphk1
		Spidr
		Ssc5d
		Stac2
		Stc1
		Stc2
		Sun2
		Svil
		Swsap1
		Taf4
		Tafa5
		Tars2
		Tbc1d31
		Tbl2
		Tceal9
		Tedc1
		Timeless
		Timp3
		Tiparp
		Tk1
		Tmem167
		Tmem229b
		Tmem63a
		Tmem74b
		Tnfsf9
		Tnk2
		Top2a
		Top2b
		Topbp1
		Tpd52
		Tpi-rs11
		Tpi1
		Traf4
		Trib3
		Trim26
		Triobp
		Trip6
		Trps1
		Ttf2
		Ube2c
		Ube2e2
		Ube2g1
		Ubfd1
		Ugdh
		Uhrf1
		Unc5b
		Upf1
		Urb1
		Usp1
		Usp45
		Usp53
		Utp20
		Vamp4
		Vegfa
		Vhl
		Vldlr
		Vps36
		Whamm
		Wipi1
		Wnt11
		Xylt2
		Zbtb39
		Zbtb7b
		Zdhhc21
		Zfp36l2
		Zfp395
		Zfp512b
		Zfp607b
		Zfp638
		Zfp945
		Zfpm1
		mt-Co2
		mt-Nd2
